# Supplementary material for: Decoding the Complexity of Systemic Inflammation Predictors in Locally Advanced Cervical Cancer, with Hemoglobin as the Hidden Key (the ESTHER Study)
Source: MDPI journal article supplement (doi:10.3390/cancers15205056), 2023-10-19
Supplement: s1 [file s1]

**Table S1:** univariate analysis of inflammatory indices (post-treatment values); survival outcomes are expresses in percentages.

| Variable  | Value     | 2-y LC | 5-y LC | p            | 2-y DMFS | 5-y DMFS | p            | 2-y DFS | 5-y DFS | P            | 2-y OS | 5-y OS | P     |
|-----------|-----------|--------|--------|--------------|----------|----------|--------------|---------|---------|--------------|--------|--------|-------|
| NLR       | < 5.665   | 88.7   | 88.7   | <b>0.037</b> | 76.5     | 73.5     | 0.856        | 71.9    | 70.5    | 0.065        | 92.0   | 74.3   | 0.197 |
|           | ≥ 5.665   | 78.0   | 76.2   |              | 83.2     | 75.4     |              | 66.7    | 57.5    |              | 83.2   | 67.4   |       |
| PLR       | < 465.135 | 85.7   | 85.7   | 0.440        | 77.1     | 71.4     | 0.378        | 67.7    | 64.0    | 0.786        | 90.3   | 67.9   | 0.538 |
|           | ≥ 465.135 | 80.7   | 79.1   |              | 82.3     | 77.5     |              | 70.4    | 64.0    |              | 84.8   | 72.4   |       |
| MLR       | < 0.685   | 84.6   | 84.6   | 0.644        | 78.3     | 73.1     | 0.777        | 70.4    | 67.2    | 0.556        | 87.8   | 71.4   | 0.712 |
|           | ≥ 0.685   | 81.6   | 79.9   |              | 81.3     | 76.1     |              | 68.0    | 61.0    |              | 86.9   | 70.0   |       |
| SII       | < 977.455 | 87.4   | 87.4   | 0.105        | 77.6     | 72.2     | 0.765        | 69.5    | 66.1    | 0.605        | 90.6   | 69.9   | 0.855 |
|           | ≥ 977.455 | 79.2   | 77.6   |              | 82.1     | 77.0     |              | 68.8    | 62.1    |              | 84.6   | 71.1   |       |
| LLR       | < 8       | 87.3   | 87.3   | 0.093        | 76.5     | 70.1     | 0.576        | 69.5    | 66.3    | 0.356        | 92.0   | 70.3   | 0.679 |
|           | ≥ 8       | 79.2   | 77.5   |              | 83.2     | 79.2     |              | 68.9    | 61.8    |              | 83.2   | 71.2   |       |
| APRI      | < 21.34   | 80.7   | 80.7   | 0.467        | 78.6     | 76.5     | 0.701        | 67.2    | 63.0    | 0.523        | 83.1   | 69.8   | 0.699 |
|           | ≥ 21.34   | 84.8   | 83.2   |              | 80.9     | 73.5     |              | 70.6    | 64.8    |              | 90.8   | 71.5   |       |
| ALRI      | < 47.06   | 84.5   | 84.5   | 0.715        | 78.4     | 73.0     | 0.426        | 70.7    | 67.3    | 0.653        | 89.5   | 70.1   | 0.762 |
|           | ≥ 47.06   | 81.9   | 80.3   |              | 80.9     | 76.1     |              | 67.8    | 61.7    |              | 85.7   | 70.9   |       |
| SIRI      | < 3.505   | 87.6   | 85.6   | 0.159        | 85.6     | 82.1     | <b>0.018</b> | 76.2    | 70.3    | <b>0.044</b> | 90.9   | 72.1   | 0.462 |
|           | ≥ 3.505   | 78.8   | 78.8   |              | 74.3     | 68.3     |              | 62.7    | 58.2    |              | 83.9   | 68.9   |       |
| ANRI      | < 7.48    | 80.5   | 80.5   | 0.418        | 78.3     | 76.1     | 0.602        | 66.7    | 62.4    | 0.436        | 82.9   | 69.2   | 0.602 |
|           | ≥ 7.48    | 85.0   | 83.4   |              | 81.1     | 73.9     |              | 70.9    | 65.2    |              | 90.9   | 71.9   |       |
| COP-NLR * | < 1       | 81.4   | 81.4   | 1            | 73.0     | 63.8     | 0.328        | 66.6    | 62.4    | 0.979        | 1      | 60.0   | 0.439 |
|           | ≥ 1       | 83.4   | 82.2   |              | 81.3     | 76.8     |              | 69.7    | 64.3    |              | 85.0   | 73.1   |       |

*Legend:* ALRI: aspartate aminotransferase to lymphocyte ratio index; ANRI: aspartate transaminase to neutrophil ratio index; APRI: aspartate aminotransferase/platelet count ratio index; COP-NLR: combination of platelet count and neutrophil to lymphocyte ratio; DFS: disease free survival; DMFS: distant metastasis free survival; LC: local control; LLR: leukocyte-to-lymphocyte ratio; MLR: monocyte to lymphocyte ratio; NLR: neutrophil to lymphocyte ratio; OS: overall survival; PLR: platelet to lymphocyte ratio; SII: systemic immune inflammation index; SIRI: systemic inflammatory response index; \* COP-NLR scored as follows: 0: NLR<3 and PLT<300; 1: NLR>3 or PLT>300; 2: NLR>3 and PLT>300.

**Table S2:** univariate analysis of Delta inflammatory indices (post-treatment values *minus* pre-treatment values); survival outcomes are expressed in percentages.

| Variable    | Value    | 2-y LC | 5-y LC | p     | 2-y DMFS | 5-y DMFS | p     | 2-y DFS | 5-y DFS | p     | 2-y OS | 5-y OS | P     |
|-------------|----------|--------|--------|-------|----------|----------|-------|---------|---------|-------|--------|--------|-------|
| Delta NLR   | < 2.79   | 84.9   | 84.9   | 0.378 | 76.5     | 71.9     | 0.799 | 68.1    | 66.7    | 0.367 | 89.4   | 73.2   | 0.529 |
|             | ≥ 2.79   | 81.5   | 79.8   |       | 83.1     | 76.9     |       | 70.2    | 61.2    |       | 85.5   | 68.3   |       |
| Delta PLR   | < 295.58 | 82.8   | 82.8   | 0.869 | 79.0     | 73.1     | 0.889 | 67.0    | 63.4    | 0.704 | 90.0   | 69.4   | 0.543 |
|             | ≥ 295.58 | 83.3   | 81.7   |       | 80.7     | 75.9     |       | 71.0    | 64.4    |       | 85.3   | 71.4   |       |
| Delta MLR   | < 0.42   | 83.3   | 83.3   | 0.701 | 76.5     | 71.3     | 0.892 | 67.9    | 64.6    | 0.659 | 87.6   | 72.1   | 0.727 |
|             | ≥ 0.42   | 82.8   | 81.1   |       | 82.7     | 77.5     |       | 70.3    | 63.3    |       | 87.1   | 69.4   |       |
| Delta SII   | < 86.66  | 80.0   | 80.0   | 0.557 | 74.6     | 70.0     | 0.556 | 64.8    | 62.7    | 0.866 | 88.4   | 69.5   | 0.836 |
|             | ≥ 86.66  | 84.5   | 83.1   |       | 82.4     | 76.8     |       | 71.2    | 64.3    |       | 86.9   | 71.2   |       |
| Delta LLR   | < 3.58   | 86.0   | 86.0   | 0.225 | 76.3     | 71.6     | 0.770 | 67.8    | 66.4    | 0.437 | 91.8   | 73.2   | 0.464 |
|             | ≥ 3.58   | 80.5   | 78.9   |       | 83.2     | 77.3     |       | 70.4    | 61.7    |       | 83.4   | 68.4   |       |
| Delta APRI  | < 20.925 | 80.6   | 80.6   | 0.444 | 78.4     | 76.2     | 0.619 | 66.9    | 62.5    | 0.463 | 82.9   | 69.2   | 0.608 |
|             | ≥ 20.925 | 84.9   | 83.3   |       | 81.1     | 73.8     |       | 70.8    | 65.1    |       | 90.9   | 71.9   |       |
| Delta ALRI  | < 37.06  | 84.7   | 84.7   | 0.688 | 77.1     | 73.6     | 0.425 | 68.2    | 66.6    | 0.859 | 89.6   | 71.8   | 0.569 |
|             | ≥ 37.06  | 81.8   | 80.3   |       | 82.1     | 75.7     |       | 69.8    | 62.3    |       | 85.7   | 69.7   |       |
| Delta SIRI  | < -16.39 | 84.7   | 82.7   | 0.882 | 85.2     | 79.5     | 0.469 | 69.4    | 65.6    | 0.950 | 87.8   | 74.4   | 0.508 |
|             | ≥ -16.39 | 81.6   | 81.6   |       | 75.3     | 70.4     |       | 68.9    | 62.6    |       | 86.9   | 67.4   |       |
| Delta ANRI  | < 3.56   | 78.8   | 78.8   | 0.253 | 76.4     | 74.1     | 0.238 | 63.6    | 56.6    | 0.105 | 83.7   | 60.5   | 0.115 |
|             | ≥ 3.56   | 86.2   | 84.7   |       | 82.4     | 76.9     |       | 73.2    | 69.1    |       | 88.8   | 77.4   |       |
| Delta COP * | < 0      | 80.7   | 80.7   | 0.302 | 79.0     | 75.6     | 1     | 83.7    | 67.3    | 0.664 | 86.9   | 72.2   | 0.858 |
|             | ≥ 0      | 88.0   | 84.7   |       | 81.9     | 70.7     |       | 70.8    | 54.4    |       | 88.2   | 65.9   |       |

*Legend:* ALRI: aspartate aminotransferase to lymphocyte ratio index; ANRI: aspartate transaminase to neutrophil ratio index; APRI: aspartate aminotransferase/platelet count ratio index; COP-NLR: combination of platelet count and neutrophil to lymphocyte ratio; DFS: disease free survival; DMFS: distant metastasis free survival; LC: local control; LLR: leukocyte-to-lymphocyte ratio; MLR: monocyte to lymphocyte ratio; NLR: neutrophil to lymphocyte ratio; OS: overall survival; PLR: platelet to lymphocyte ratio; SII: systemic immune inflammation index; SIRI: systemic inflammatory response index; \* COP scored as follows: 0: NLR<3 & PLT<300; 1: NLR>3 or PLT>300; 2: NLR>3 and PLT>300
